# Supplementary material for: Ligand ratio/solvent-influenced syntheses, crystal structures, and magnetic properties of polydentate Schiff base ligand-Dy(iii) compounds with β-diketonate ligands as co-ligands
Source: Royal Society of Chemistry journal article supplement (doi:10.1039/c9dt02618e), 2019-01-01
Supplement: c9dt02618e1.pdf [file c9dt02618e1.pdf]

**Ligand Ratio/Solvent-Influenced Syntheses, Crystal Structures, Magnetic Properties of Polydentate Schiff Base Ligand-Dy<sup>III</sup> Compounds with  $\beta$ -Diketonate Ligand as Co-Ligand**

Sheng Zhang,<sup>\*a</sup> Wenjiao Mo,<sup>a</sup> Zengqi Zhang,<sup>d</sup> Fei Gao,<sup>e</sup> Lei Wang,<sup>\*b</sup> Dengwei Hu,<sup>a</sup> Sanping Chen<sup>\*c</sup>

---

<sup>a</sup> *College of Chemistry and Chemical Engineering, Baoji University of Arts and Sciences, Baoji 721013, China.*

<sup>b</sup> *School of Environmental Science and Engineering, Nanjing Tech University, Nanjing 210009, China*

<sup>c</sup> *Key Laboratory of Synthetic and Natural Functional Molecule Chemistry of Ministry of Education, College of Chemistry and Materials Science, Northwest University, Xi'an, Shaanxi 710069, China*

<sup>d</sup> *Qingdao Institute of Bioenergy and Bioprocess Technology, Chinese Academy of Sciences, Qingdao 266101, PR China*

<sup>e</sup> *School of Materials and Metallurgy, Inner Mongolia University of Science and Technology, 7# Aerding Street, Kun District, Baotou 014010, China.*

---

**Corresponding authors**

**Dr. Sheng Zhang, Prof. Lei Wang, Prof. Sanping Chen**

**E-mail address: zhangsheng19890501@163.com; wlei@njtech.edu.cn;  
sanpingchen@126.com**

## 1 The synthesis ligand H<sub>2</sub>L

### 1.1 2-Hydroxy-3-(chloromethyl)-5-methyl-benzaldehyde (HCMB)

HCMB was prepared by a direct chloromethylation of HMB. In a 250 mL round bottom flask, a mixture of 6.4 g (4.7 mmol) of HMB, 7.5 mL of formaldehyde and 25 mL of HCl (12 mol/L) was heated under magnetic stirring to reflux for 15 min. After cool down the reaction to 0 °C, a solid mass was formed in the bottom. The solid was separated from the reaction solution and recrystallized in hot ethanol, yielding 5 g of HCMB (70% yield). The residual solutions were basified with NaOH (pH > 9) prior to discard them. <sup>1</sup>H NMR (400 MHz, CDCl<sub>3</sub>) δ 11.24 (s, 1H), 9.80 (s, 1H), 7.42 (d, *J* = 2.1 Hz, 1H), 7.30 (d, *J* = 1.4 Hz, 1H), 4.64 (s, 2H), 2.31 (d, *J* = 4.4 Hz, 3H). <sup>13</sup>C NMR (100 MHz, CDCl<sub>3</sub>) δ 196.7, 196.5, 159.5, 157.3, 138.6, 138.1, 134.1, 133.5, 129.3, 129.2, 125.7, 120.4, 120.4, 117.4, 39.9, 20.3, 20.2.

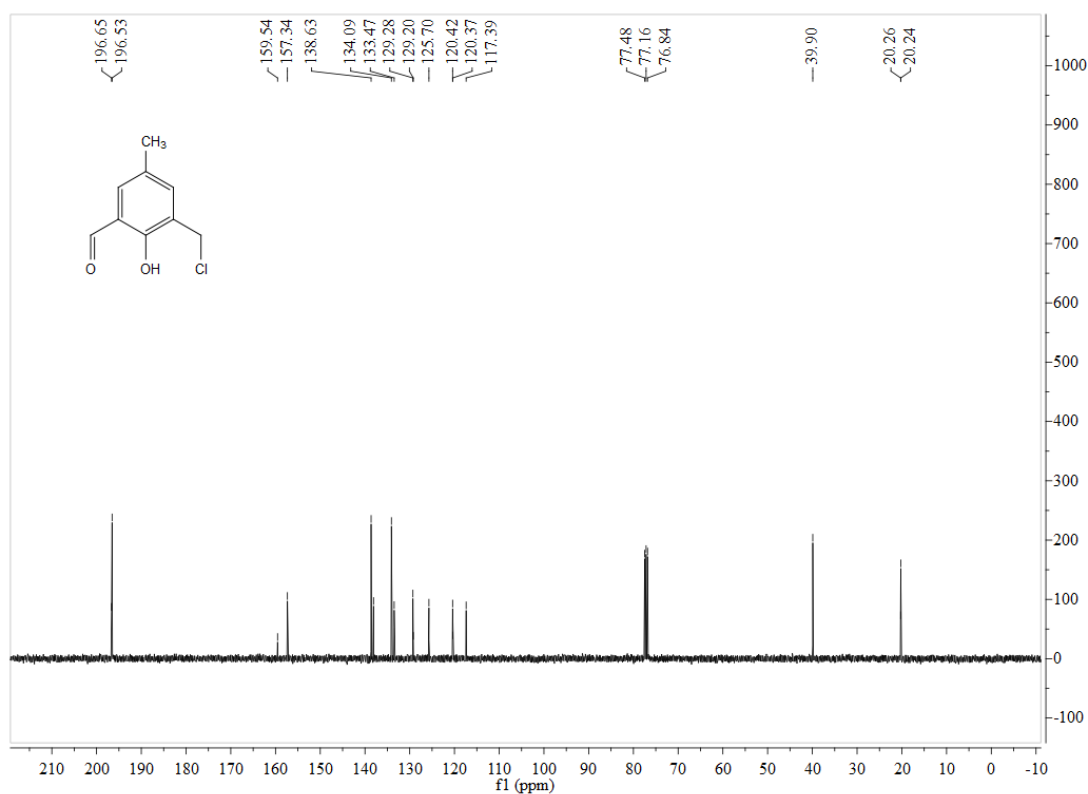

Fig. S1 <sup>13</sup>C NMR spectra of HCMB.

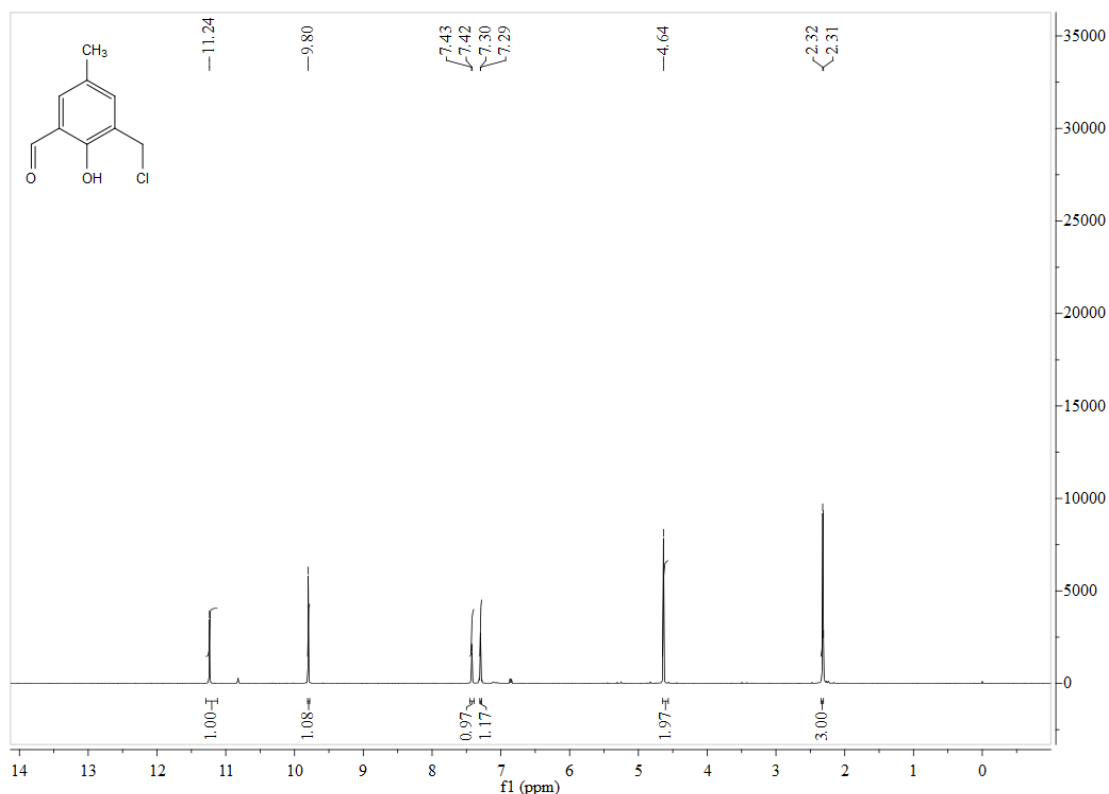

Fig. S2 <sup>1</sup>H NMR spectra of HCMB.

## 1.2 N,N'-bis(pyridin-2-ylmethyl)ethylenediamine (py<sub>2</sub>en)

Py<sub>2</sub>en was prepared by a condensation reaction between 2-pyridinecarboxaldehyde and ethylenediamine, followed by reduction with NaBH<sub>4</sub>. In a 100 mL round bottom flask, 3.0 mL of pyridine-2-carboxaldehyde (31 mmol) were dissolved in 30 mL of methanol at 0 °C, followed by the addition of 1.0 mL of ethylenediamine (15.5 mmol), under magnetic stirring. After 1 h, 1.2 g of sodium borohydride (31 mmol) was added in small portions and left to react for another 1 h. Then, HCl 6 mol/L was added dropwise up to pH < 2. After removing the solvent, 30 mL of distilled water was added and the pH adjusted to 9–10 with NaOH. The product was extracted with dichloromethane (6 × 50 mL); the organic layers were dried under MgSO<sub>4</sub> and the solvent was removed under vacuum, yielding 2.8 g of a yellow oil of py<sub>2</sub>en (85 % yield). <sup>1</sup>H NMR (400 MHz, CDCl<sub>3</sub>) δ 8.57-8.51 (m, 2H), 7.62 (td, *J* = 7.7, 1.8 Hz, 2H), 7.32 (d, *J* = 7.8 Hz, 2H), 7.14 (ddd, *J* = 7.4, 4.9, 0.9 Hz, 2H), 3.92 (s, 4H), 2.82 (s, 4H). <sup>13</sup>C NMR (100 MHz, CDCl<sub>3</sub>) δ 159.8, 149.1, 136.3, 122.1, 121.7, 55.1, 49.0.

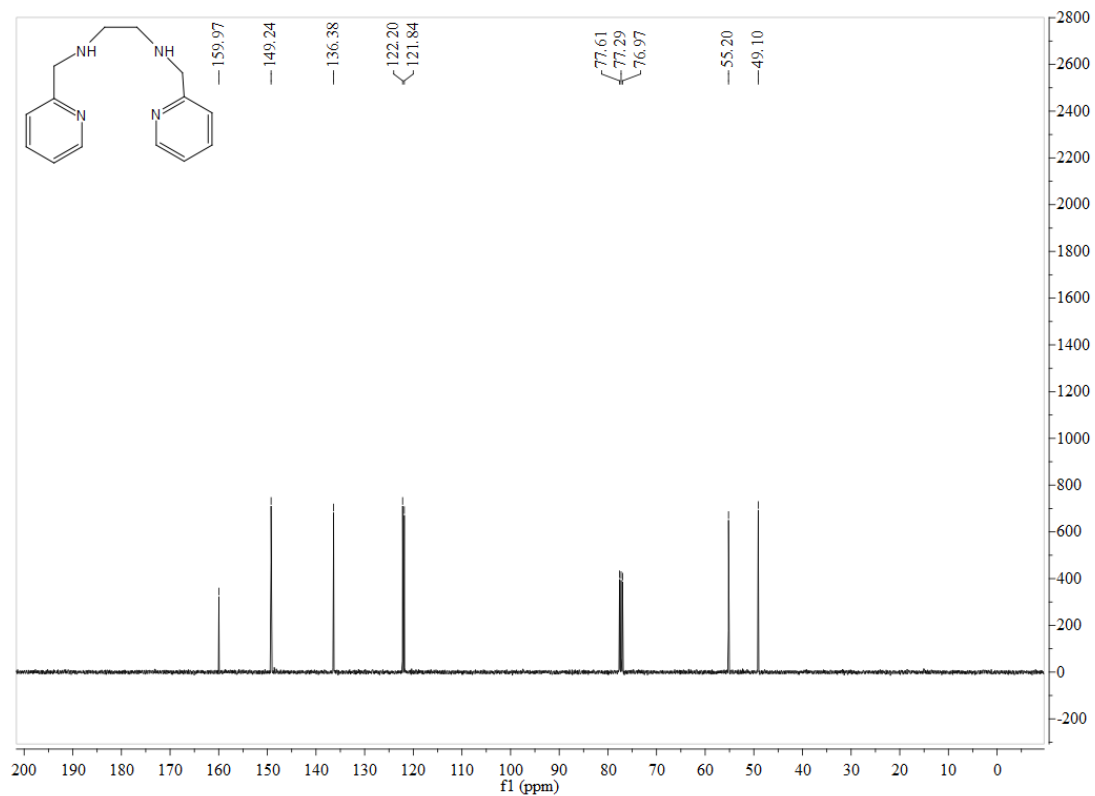

Fig. S3 <sup>13</sup>C NMR spectra of py<sub>2</sub>en.

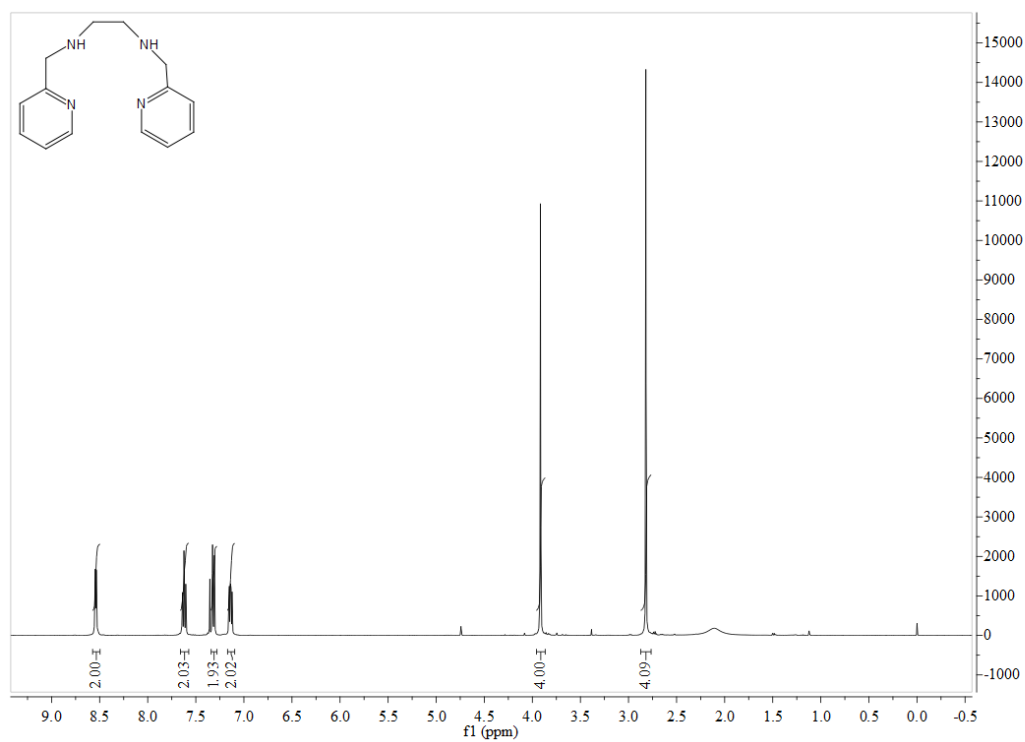

Fig. S4 <sup>1</sup>H NMR spectra of HCMB.

## 1.3

*N,N'*-bis(2-hydroxy-5-methyl-3-formylbenzyl)-*N,N'*-bis-(pyridin-2-ylmethyl)ethylene diamine, H<sub>2</sub>L

In a 100 mL round bottom flask, 4.6 g of HCMB (25 mmol) and 3.0 g of py<sub>2</sub>en (12 mmol) were dissolved in 40 mL of dichloromethane. Then, 3.5 mL of triethylamine (25 mmol) was added dropwise. After 24 h at room temperature, the reaction solution was washed with a saturated solution of NaHCO<sub>3</sub> and the organic layers dried with MgSO<sub>4</sub>. After removing the solvent under vacuum, 6.4 g of H<sub>2</sub>L were obtained, as viscous yellow oil (96% yield). <sup>1</sup>H NMR (400 MHz, CDCl<sub>3</sub>) δ 10.19 (d, *J* = 2.2 Hz, 2H), 8.53 (dd, *J* = 2.8, 2.0 Hz, 2H), 7.59 (dd, *J* = 10.6, 4.7 Hz, 2H), 7.37 (s, 2H), 7.25 (d, *J* = 7.7 Hz, 2H), 7.16 (dd, *J* = 12.7, 7.6 Hz, 4H), 3.74 (s, 4H), 3.66 (s, 4H), 2.75 (s, 4H), 2.23 (s, 6H). <sup>13</sup>C NMR (100 MHz, CDCl<sub>3</sub>) δ 192.6, 159.0, 157.9, 148.9, 137.5, 136.7, 128.8, 128.1, 125.0, 123.2, 122.3, 122.2, 59.4, 54.9, 50.5, 20.3. HRMS (ESI) for C<sub>32</sub>H<sub>35</sub>N<sub>4</sub>O<sub>4</sub> [M+H<sup>+</sup>]: Calcd: 539.2209; Found: 539.2202. IR (KBr): 2958, 2844, 1590, 1471, 1240, 1083, 989, 871.

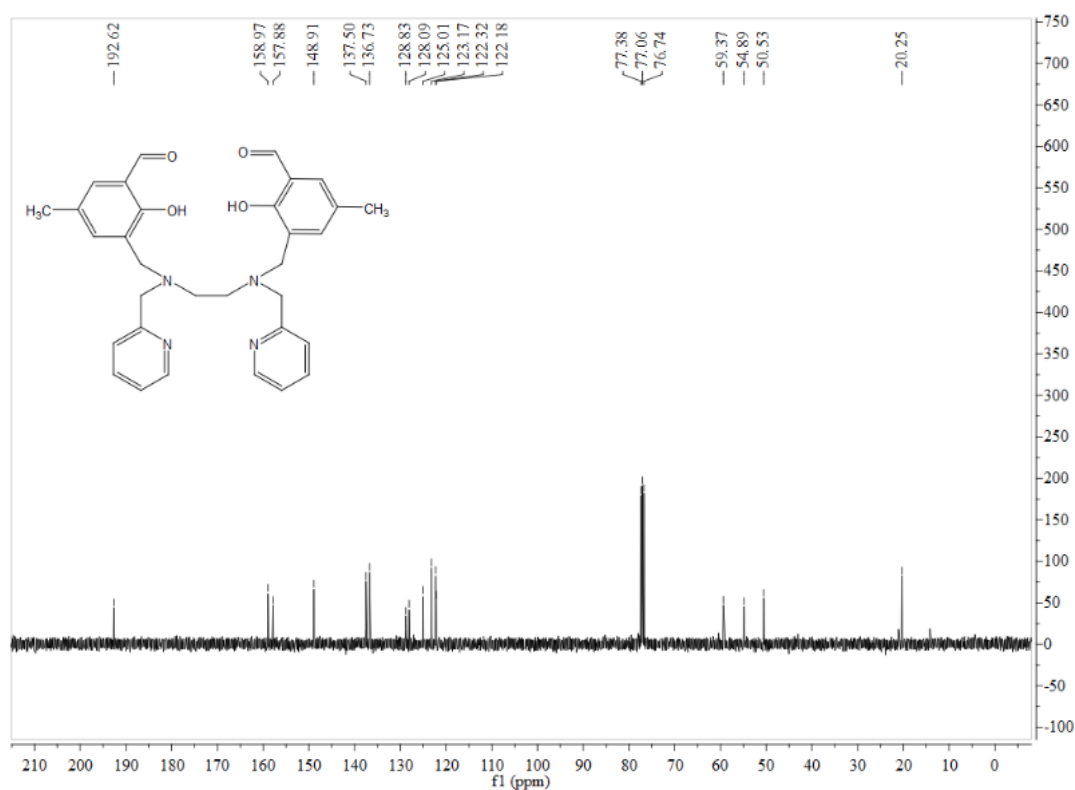

Fig. S5 <sup>13</sup>C NMR spectra of H<sub>2</sub>L.

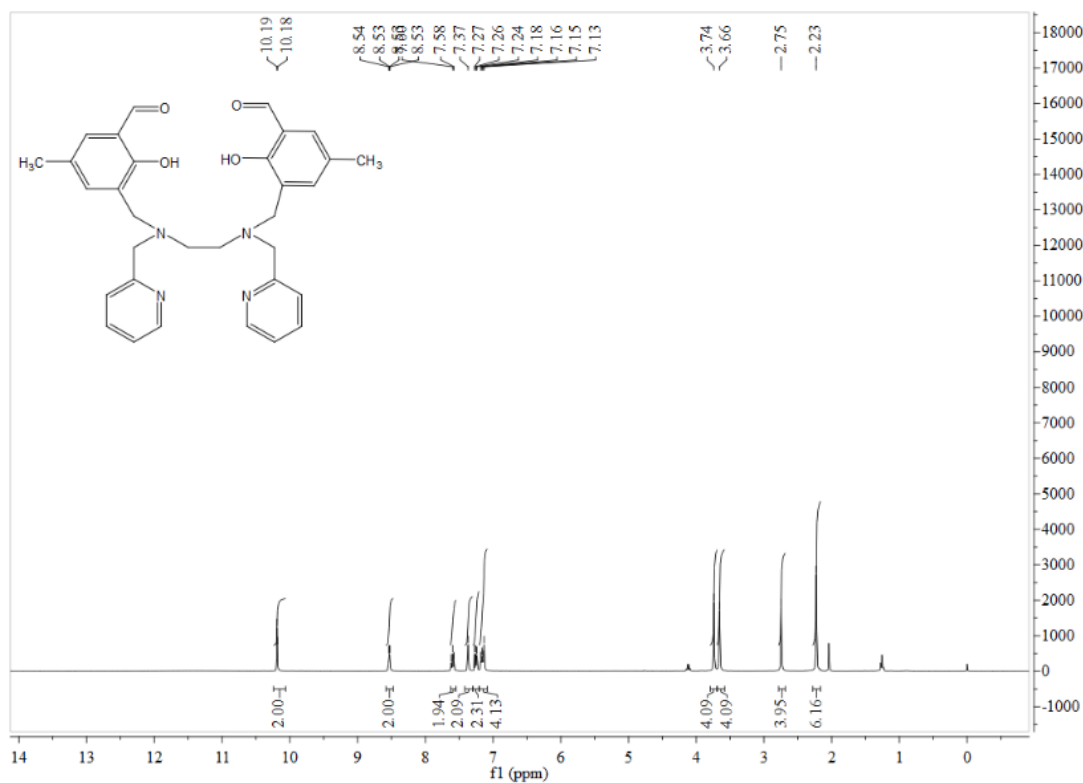

Fig. S6  $^1\text{H}$  NMR spectra of  $\text{H}_2\text{L}$ .

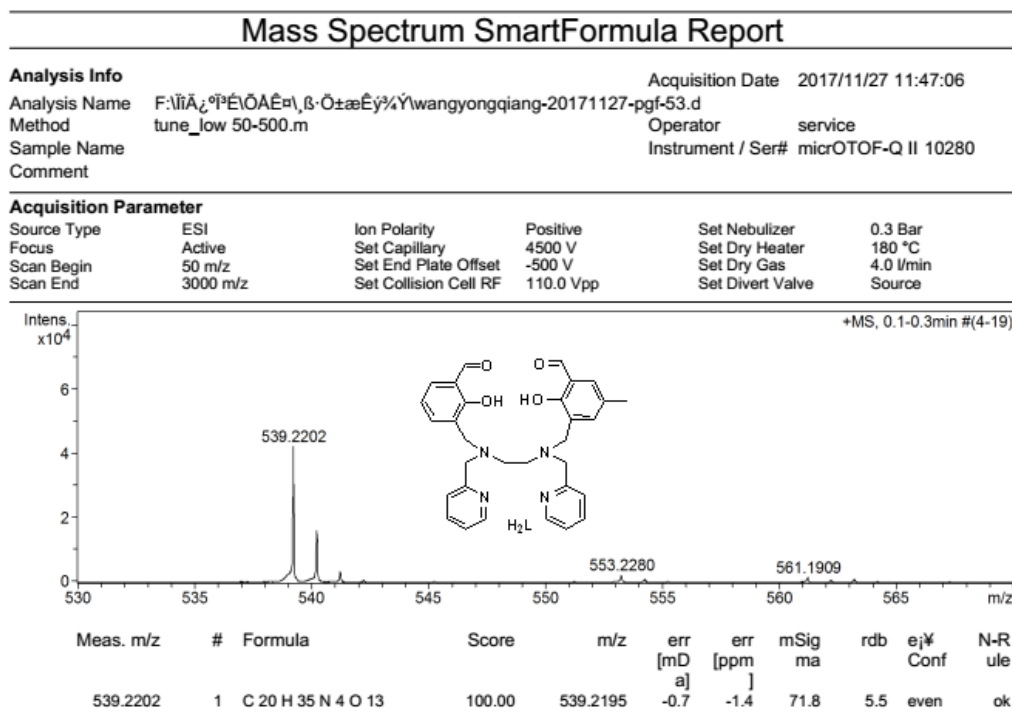

Fig. S7 HRMS spectra of  $\text{H}_2\text{L}$ .

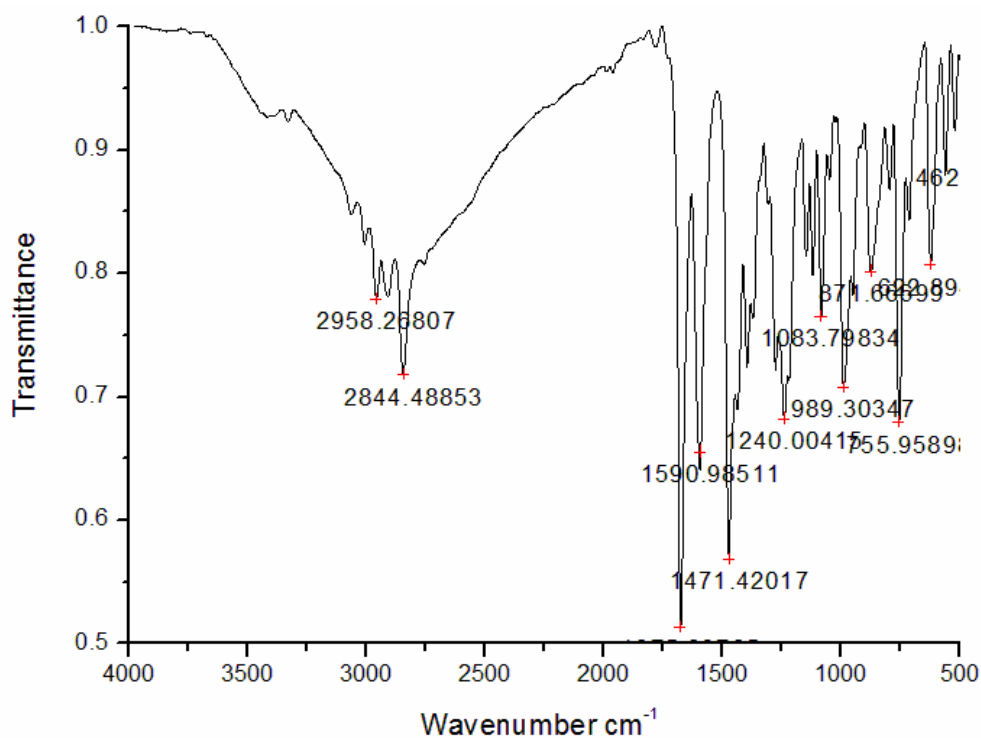

Fig. S8 FTIR spectra of H<sub>2</sub>L.

## 2. The structure information of 1-3, 1a-3a and 3b.

**Table S1.** Crystallographic Data and Structural Refinements for **1a**, **2a**, **3a** and **3b**.

| Compound                                       | <b>1a</b>                                           | <b>2a</b>                                           | <b>3a</b>                                                                      | <b>3b</b>                                                       |
|------------------------------------------------|-----------------------------------------------------|-----------------------------------------------------|--------------------------------------------------------------------------------|-----------------------------------------------------------------|
| molecular formula                              | C <sub>53</sub> DyN <sub>0.12</sub> O <sub>13</sub> | C <sub>51</sub> DyN <sub>0.25</sub> O <sub>14</sub> | C <sub>77</sub> H <sub>65</sub> Dy <sub>2</sub> N <sub>4</sub> O <sub>10</sub> | C <sub>65</sub> Dy <sub>2</sub> N <sub>17</sub> O <sub>24</sub> |
| formula weight                                 | 1008.78                                             | 1002.51                                             | 1531.33                                                                        | 1727.82                                                         |
| temperature                                    | 293(2)                                              | 293(2)                                              | 293(2)                                                                         | 293(2)                                                          |
| crystal system                                 | monoclinic                                          | monoclinic                                          | cubic                                                                          | cubic                                                           |
| space group                                    | <i>C2/c</i>                                         | <i>P2<sub>1</sub>/c</i>                             | <i>Pa3</i>                                                                     | <i>Pa3</i>                                                      |
| <i>a</i> (Å)                                   | 28.071(2)                                           | 22.8242(5)                                          | 35.3274(5)                                                                     | 35.3274(5)                                                      |
| <i>b</i> (Å)                                   | 14.8132(10)                                         | 15.3037(4)                                          | 35.3274(5)                                                                     | 35.3274(5)                                                      |
| <i>c</i> (Å)                                   | 20.9718(12)                                         | 11.8447(3)                                          | 35.3274(5)                                                                     | 35.3274(5)                                                      |
| $\alpha$ (deg)                                 | 90                                                  | 90                                                  | 90                                                                             | 90                                                              |
| $\beta$ (deg)                                  | 96.366(6)                                           | 90.236(2)                                           | 90                                                                             | 90                                                              |
| $\gamma$ (deg)                                 | 90                                                  | 90                                                  | 90                                                                             | 90                                                              |
| <i>V</i> (Å <sup>3</sup> )                     | 8666.9(10)                                          | 4137.28(16)                                         | 44090(2)                                                                       | 43953(2)                                                        |
| <i>Z</i>                                       | 8                                                   | 4                                                   | 24                                                                             | 24                                                              |
| <i>D</i> <sub>calc</sub> (g cm <sup>-3</sup> ) | 1.546                                               | 1.609                                               | 1.384                                                                          | 1.562                                                           |
| <i>F</i> (000)                                 | 3911                                                | 1943                                                | 18408                                                                          | 19992                                                           |
| $\mu$ /mm <sup>-1</sup>                        | 9.825                                               | 10.305                                              | 11.219                                                                         | 11.512                                                          |

|                                 |               |               |               |               |
|---------------------------------|---------------|---------------|---------------|---------------|
| $\theta$ min-max/ $^\circ$      | 3.895-67.246  | 3.477-67.236  | 3.064-67.216  | 3.064-67.216  |
| reflections collected           | 18385         | 30251         | 39571         | 39571         |
| GOF on $F^2$                    | 1.029         | 1.015         | 0.853         | 1.036         |
| $R_1/wR_2$ [ $I > 2\sigma(I)$ ] | 0.0710/0.1815 | 0.0959/0.2397 | 0.0730/0.1939 | 0.0935/0.2579 |
| $R_1/wR_2$ [all data]           | 0.1115/0.2161 | 0.1090/0.2545 | 0.1640/0.2709 | 0.1915/0.3255 |

$${}^a R_1 = \frac{\sum |F_o| - |F_c|}{\sum |F_o|}, \quad {}^b wR_2 = \left[ \frac{\sum w(F_o^2 - F_c^2)^2}{\sum w(F_o^2)^2} \right]^{1/2}.$$

**Table S2.** Selected bond lengths (Å) and angles ( $^\circ$ ) for **1-3**.

| Compound 1      |            |                 |            |
|-----------------|------------|-----------------|------------|
| Dy(1)-O(1)      | 2.223(3)   | O(1)-Dy(1)-N(4) | 74.93(12)  |
| Dy(1)-O(3)      | 2.268(3)   | O(3)-Dy(1)-N(4) | 132.64(12) |
| Dy(1)-O(6)      | 2.299(3)   | O(6)-Dy(1)-N(4) | 113.43(13) |
| Dy(1)-O(5)      | 2.334(3)   | O(5)-Dy(1)-N(4) | 69.68(12)  |
| Dy(1)-N(1)      | 2.594(4)   | N(1)-Dy(1)-N(4) | 144.87(12) |
| Dy(1)-N(4)      | 2.604(4)   | O(1)-Dy(1)-N(2) | 76.55(13)  |
| Dy(1)-N(2)      | 2.626(4)   | O(3)-Dy(1)-N(2) | 92.62(12)  |
| Dy(1)-N(3)      | 2.637(4)   | O(6)-Dy(1)-N(2) | 140.54(12) |
| O(1)-Dy(1)-O(3) | 151.29(12) | O(5)-Dy(1)-N(2) | 148.25(12) |
| O(1)-Dy(1)-O(6) | 81.08(12)  | N(1)-Dy(1)-N(2) | 66.01(12)  |
| O(3)-Dy(1)-O(6) | 91.69(13)  | N(4)-Dy(1)-N(2) | 91.63(12)  |
| O(1)-Dy(1)-O(5) | 119.99(12) | O(1)-Dy(1)-N(3) | 124.02(12) |
| O(3)-Dy(1)-O(5) | 82.89(12)  | O(3)-Dy(1)-N(3) | 74.61(12)  |
| O(6)-Dy(1)-O(5) | 71.17(11)  | O(6)-Dy(1)-N(3) | 148.05(12) |
| O(1)-Dy(1)-N(1) | 73.70(12)  | O(5)-Dy(1)-N(3) | 78.46(12)  |
| O(3)-Dy(1)-N(1) | 77.60(12)  | N(1)-Dy(1)-N(3) | 126.04(13) |
| O(6)-Dy(1)-N(1) | 76.74(12)  | N(4)-Dy(1)-N(3) | 62.79(12)  |
| O(5)-Dy(1)-N(1) | 141.68(12) | N(2)-Dy(1)-N(3) | 70.09(12)  |
| Compound 2      |            |                 |            |
| Dy(1)-O(3)      | 2.219(4)   | O(3)-Dy(1)-N(1) | 78.17(13)  |
| Dy(1)-O(1)      | 2.224(4)   | O(1)-Dy(1)-N(1) | 73.48(13)  |
| Dy(1)-O(5)      | 2.295(3)   | O(5)-Dy(1)-N(1) | 77.59(13)  |
| Dy(1)-O(6)      | 2.302(3)   | O(6)-Dy(1)-N(1) | 145.41(13) |
| Dy(1)-N(4)      | 2.598(4)   | N(4)-Dy(1)-N(1) | 144.43(13) |
| Dy(1)-N(1)      | 2.628(4)   | O(3)-Dy(1)-N(2) | 94.68(14)  |
| Dy(1)-N(2)      | 2.648(4)   | O(1)-Dy(1)-N(2) | 77.03(14)  |
| Dy(1)-N(3)      | 2.652(4)   | O(5)-Dy(1)-N(2) | 140.74(13) |
| O(3)-Dy(1)-O(1) | 151.35(13) | O(6)-Dy(1)-N(2) | 147.12(13) |
| O(3)-Dy(1)-O(5) | 87.47(13)  | N(4)-Dy(1)-N(2) | 91.14(14)  |
| O(1)-Dy(1)-O(5) | 82.52(13)  | N(1)-Dy(1)-N(2) | 64.65(14)  |



|                   |            |                   |            |
|-------------------|------------|-------------------|------------|
| O(3)-Dy(1)-O(6)   | 84.11(13)  | O(3)-Dy(1)-N(3)   | 74.68(13)  |
| O(1)-Dy(1)-O(6)   | 117.65(13) | O(1)-Dy(1)-N(3)   | 125.33(13) |
| O(5)-Dy(1)-O(6)   | 72.13(12)  | O(5)-Dy(1)-N(3)   | 147.16(13) |
| O(3)-Dy(1)-N(4)   | 132.16(13) | O(6)-Dy(1)-N(3)   | 78.68(13)  |
| O(1)-Dy(1)-N(4)   | 75.97(13)  | N(4)-Dy(1)-N(3)   | 63.26(14)  |
| O(5)-Dy(1)-N(4)   | 115.98(13) | N(1)-Dy(1)-N(3)   | 123.56(14) |
| O(6)-Dy(1)-N(4)   | 66.84(12)  | N(2)-Dy(1)-N(3)   | 69.40(14)  |
| <b>Compound 3</b> |            |                   |            |
| Dy(1)-O(2)        | 2.300(7)   | O(2)-Dy(1)-Dy(2)  | 156.6(2)   |
| Dy(1)-O(3)        | 2.304(7)   | O(3)-Dy(1)-Dy(2)  | 88.5(2)    |
| Dy(1)-O(8)        | 2.310(7)   | O(8)-Dy(1)-Dy(2)  | 31.98(17)  |
| Dy(1)-O(1)        | 2.319(7)   | O(1)-Dy(1)-Dy(2)  | 113.2(2)   |
| Dy(1)-O(4)        | 2.336(7)   | O(4)-Dy(1)-Dy(2)  | 111.90(18) |
| Dy(1)-O(9)        | 2.370(7)   | O(9)-Dy(1)-Dy(2)  | 32.87(16)  |
| Dy(1)-O(10)       | 2.449(8)   | O(10)-Dy(1)-Dy(2) | 81.0(2)    |
| Dy(1)-O(7)        | 2.480(8)   | O(7)-Dy(1)-Dy(2)  | 82.17(19)  |
| Dy(1)-Dy(2)       | 3.9031(9)  | O(6)-Dy(2)-O(5)   | 72.7(3)    |
| Dy(2)-O(6)        | 2.275(8)   | O(6)-Dy(2)-O(8)   | 133.2(3)   |
| Dy(2)-O(5)        | 2.287(8)   | O(5)-Dy(2)-O(8)   | 83.4(3)    |
| Dy(2)-O(8)        | 2.297(7)   | O(6)-Dy(2)-O(9)   | 80.5(3)    |
| Dy(2)-O(9)        | 2.305(7)   | O(5)-Dy(2)-O(9)   | 100.4(3)   |
| Dy(2)-N(2)        | 2.575(9)   | O(8)-Dy(2)-O(9)   | 64.8(2)    |
| Dy(2)-N(1)        | 2.585(9)   | O(6)-Dy(2)-N(2)   | 149.3(3)   |
| Dy(2)-N(4)        | 2.590(11)  | O(5)-Dy(2)-N(2)   | 133.8(3)   |
| Dy(2)-N(3)        | 2.616(9)   | O(8)-Dy(2)-N(2)   | 73.2(3)    |
| O(2)-Dy(1)-O(3)   | 114.7(3)   | O(9)-Dy(2)-N(2)   | 104.4(3)   |
| O(2)-Dy(1)-O(8)   | 142.9(3)   | O(6)-Dy(2)-N(1)   | 122.2(3)   |
| O(3)-Dy(1)-O(8)   | 82.4(3)    | O(5)-Dy(2)-N(1)   | 76.4(3)    |
| O(2)-Dy(1)-O(1)   | 73.3(3)    | O(8)-Dy(2)-N(1)   | 88.7(3)    |
| O(3)-Dy(1)-O(1)   | 73.6(3)    | O(9)-Dy(2)-N(1)   | 153.5(3)   |
| O(8)-Dy(1)-O(1)   | 81.5(3)    | N(2)-Dy(2)-N(1)   | 64.0(3)    |
| O(2)-Dy(1)-O(4)   | 79.5(3)    | O(6)-Dy(2)-N(4)   | 69.3(3)    |
| O(3)-Dy(1)-O(4)   | 73.0(3)    | O(5)-Dy(2)-N(4)   | 104.7(3)   |
| O(8)-Dy(1)-O(4)   | 137.5(2)   | O(8)-Dy(2)-N(4)   | 157.3(3)   |
| O(1)-Dy(1)-O(4)   | 121.9(3)   | O(9)-Dy(2)-N(4)   | 132.0(3)   |
| O(2)-Dy(1)-O(9)   | 146.4(3)   | N(2)-Dy(2)-N(4)   | 86.5(3)    |
| O(3)-Dy(1)-O(9)   | 83.4(3)    | N(1)-Dy(2)-N(4)   | 73.1(3)    |
| O(8)-Dy(1)-O(9)   | 63.5(2)    | O(6)-Dy(2)-N(3)   | 81.1(3)    |
| O(1)-Dy(1)-O(9)   | 140.3(3)   | O(5)-Dy(2)-N(3)   | 153.8(3)   |
| O(4)-Dy(1)-O(9)   | 79.4(2)    | O(8)-Dy(2)-N(3)   | 116.2(3)   |
| O(2)-Dy(1)-O(10)  | 81.2(3)    | O(9)-Dy(2)-N(3)   | 75.3(3)    |
| O(3)-Dy(1)-O(10)  | 144.3(3)   | N(2)-Dy(2)-N(3)   | 71.3(3)    |
| O(8)-Dy(1)-O(10)  | 104.2(3)   | N(1)-Dy(2)-N(3)   | 118.8(3)   |

|                  |          |                  |           |
|------------------|----------|------------------|-----------|
| O(1)-Dy(1)-O(10) | 141.6(3) | N(4)-Dy(2)-N(3)  | 64.2(3)   |
| O(4)-Dy(1)-O(10) | 79.5(3)  | O(6)-Dy(2)-Dy(1) | 104.7(2)  |
| O(9)-Dy(1)-O(10) | 69.4(3)  | O(5)-Dy(2)-Dy(1) | 85.2(2)   |
| O(2)-Dy(1)-O(7)  | 77.9(3)  | O(8)-Dy(2)-Dy(1) | 32.19(16) |
| O(3)-Dy(1)-O(7)  | 140.4(3) | O(9)-Dy(2)-Dy(1) | 33.92(17) |
| O(8)-Dy(1)-O(7)  | 69.5(2)  | N(2)-Dy(2)-Dy(1) | 94.2(2)   |
| O(1)-Dy(1)-O(7)  | 75.0(3)  | N(1)-Dy(2)-Dy(1) | 120.1(2)  |
| O(4)-Dy(1)-O(7)  | 145.8(3) | N(4)-Dy(2)-Dy(1) | 165.5(2)  |
| O(9)-Dy(1)-O(7)  | 106.8(3) | N(3)-Dy(2)-Dy(1) | 102.3(2)  |
| O(10)-Dy(1)-O(7) | 71.9(3)  |                  |           |

**Table S3** Dy<sup>III</sup> ion geometry analysis by SHAPE 2.1 software.

| Configuration                                           | ABOXIY,<br>1 | ABOXIY,<br>2 | ABOXIY,<br>3 |        |
|---------------------------------------------------------|--------------|--------------|--------------|--------|
|                                                         |              |              | Dy1          | Dy2    |
| Octagon(D8h)                                            | 31.594       | 31.307       | 31.581       | 32.874 |
| Heptagonal pyramid(C7v)                                 | 21.493       | 20.923       | 23.065       | 23.596 |
| Hexagonal bipyramid(D6h)                                | 12.285       | 12.168       | 16.750       | 12.324 |
| Cube(Oh)                                                | 8.272        | 8.763        | 9.846        | 5.044  |
| Square antiprism ( $D_{4d}$ )                           | 2.401        | 2.149        | 0.629        | 2.679  |
| Triangular dodecahedron ( $D_{2d}$ )                    | 1.256        | 1.765        | 2.480        | 1.308  |
| Johnson gyrobifastigium J26 ( $D_{2d}$ )                | 12.163       | 11.526       | 16.448       | 15.694 |
| Johnson elongated triangular bipyramid J14 ( $D_{3h}$ ) | 26.847       | 26.775       | 27.866       | 27.158 |
| Biaugmented trigonal prism J50 ( $C_{2v}$ )             | 2.042        | 1.983        | 2.874        | 4.334  |
| Biaugmented trigonal prism ( $C_{2v}$ )                 | 2.042        | 2.128        | 2.248        | 3.739  |
| Snub sphenoid J84 ( $D_{2d}$ )                          | 4.272        | 4.258        | 5.082        | 5.166  |
| Triakis tetrahedron(Td)                                 | 9.029        | 9.554        | 10.699       | 5.931  |
| Elongated trigonal bipyramid(D3h)                       | 24.373       | 23.312       | 24.149       | 23.932 |

-----  
 S H A P E v2.1 Continuous Shape Measures calculation  
 (c) 2013 Electronic Structure Group, Universitat de Barcelona  
 Contact: llunell@ub.edu  
 -----

Dy structures of **1**

OP-8 1 D8h Octagon  
 HPY-8 2 C7v Heptagonal pyramid  
 HBPY-8 3 D6h Hexagonal bipyramid  
 CU-8 4 Oh Cube  
 SAPR-8 5 D4d Square antiprism  
 TDD-8 6 D2d Triangular dodecahedron  
 JGBF-8 7 D2d Johnson gyrobifastigium J26

|          |        |                                            |
|----------|--------|--------------------------------------------|
| JETBPY-8 | 8 D3h  | Johnson elongated triangular bipyramid J14 |
| JBTPR-8  | 9 C2v  | Biaugmented trigonal prism J50             |
| BTPR-8   | 10 C2v | Biaugmented trigonal prism                 |
| JSD-8    | 11 D2d | Snub diphenoid J84                         |
| TT-8     | 12 Td  | Triakis tetrahedron                        |
| ETBPY-8  | 13 D3h | Elongated trigonal bipyramid               |

| Structure [ML8] | OP-8    | HPY-8    | HBPY-8  | CU-8   | SAPR-8 |         |
|-----------------|---------|----------|---------|--------|--------|---------|
| TDD-8           | JGBF-8  | JETBPY-8 | JBTPR-8 | BTPR-8 | JSD-8  | TT-8    |
| ETBPY-8         |         |          |         |        |        |         |
| ABOXIY,         | 31.594, | 21.493,  | 12.285, | 8.272, | 2.401, | 1.256,  |
| 26.847,         | 2.042,  | 2.042,   | 4.272,  | 9.029, | 24.373 | 12.163, |

-----  
S H A P E v2.1 Continuous Shape Measures calculation  
(c) 2013 Electronic Structure Group, Universitat de Barcelona  
Contact: llunell@ub.edu  
-----

Dy structures of **2**

|          |        |                                            |
|----------|--------|--------------------------------------------|
| OP-8     | 1 D8h  | Octagon                                    |
| HPY-8    | 2 C7v  | Heptagonal pyramid                         |
| HBPY-8   | 3 D6h  | Hexagonal bipyramid                        |
| CU-8     | 4 Oh   | Cube                                       |
| SAPR-8   | 5 D4d  | Square antiprism                           |
| TDD-8    | 6 D2d  | Triangular dodecahedron                    |
| JGBF-8   | 7 D2d  | Johnson gyrobifastigium J26                |
| JETBPY-8 | 8 D3h  | Johnson elongated triangular bipyramid J14 |
| JBTPR-8  | 9 C2v  | Biaugmented trigonal prism J50             |
| BTPR-8   | 10 C2v | Biaugmented trigonal prism                 |
| JSD-8    | 11 D2d | Snub diphenoid J84                         |
| TT-8     | 12 Td  | Triakis tetrahedron                        |
| ETBPY-8  | 13 D3h | Elongated trigonal bipyramid               |

| Structure [ML8] | OP-8    | HPY-8    | HBPY-8  | CU-8   | SAPR-8 |         |
|-----------------|---------|----------|---------|--------|--------|---------|
| TDD-8           | JGBF-8  | JETBPY-8 | JBTPR-8 | BTPR-8 | JSD-8  | TT-8    |
| ETBPY-8         |         |          |         |        |        |         |
| ABOXIY,         | 31.307, | 20.923,  | 12.168, | 8.763, | 2.149, | 1.765,  |
| 26.775,         | 1.983,  | 2.128,   | 4.258,  | 9.554, | 23.312 | 11.526, |

-----  
S H A P E v2.1 Continuous Shape Measures calculation  
(c) 2013 Electronic Structure Group, Universitat de Barcelona  
Contact: llunell@ub.edu  
-----

Dy structures of **3(Dy1)**

|          |        |                                            |
|----------|--------|--------------------------------------------|
| OP-8     | 1 D8h  | Octagon                                    |
| HPY-8    | 2 C7v  | Heptagonal pyramid                         |
| HBPY-8   | 3 D6h  | Hexagonal bipyramid                        |
| CU-8     | 4 Oh   | Cube                                       |
| SAPR-8   | 5 D4d  | Square antiprism                           |
| TDD-8    | 6 D2d  | Triangular dodecahedron                    |
| JGBF-8   | 7 D2d  | Johnson gyrobifastigium J26                |
| JETBPY-8 | 8 D3h  | Johnson elongated triangular bipyramid J14 |
| JBTPR-8  | 9 C2v  | Biaugmented trigonal prism J50             |
| BTPR-8   | 10 C2v | Biaugmented trigonal prism                 |
| JSD-8    | 11 D2d | Snub diphenoid J84                         |
| TT-8     | 12 Td  | Triakis tetrahedron                        |
| ETBPY-8  | 13 D3h | Elongated trigonal bipyramid               |

| Structure [ML8] | OP-8    | HPY-8    | HBPY-8  | CU-8    | SAPR-8 |        |         |
|-----------------|---------|----------|---------|---------|--------|--------|---------|
| TDD-8           | JGBF-8  | JETBPY-8 | JBTPR-8 | BTPR-8  | JSD-8  | TT-8   |         |
| ETBPY-8         |         |          |         |         |        |        |         |
| ABOXIY,         | 31.581, | 23.065,  | 16.750, | 9.846,  | 0.629, | 2.480, | 16.448, |
| 27.866,         | 2.874,  | 2.248,   | 5.082,  | 10.699, | 24.149 |        |         |

-----  
 S H A P E v2.1 Continuous Shape Measures calculation  
 (c) 2013 Electronic Structure Group, Universitat de Barcelona  
 Contact: llunell@ub.edu  
 -----

Dy structures of **3(Dy2)**

|          |        |                                            |
|----------|--------|--------------------------------------------|
| OP-8     | 1 D8h  | Octagon                                    |
| HPY-8    | 2 C7v  | Heptagonal pyramid                         |
| HBPY-8   | 3 D6h  | Hexagonal bipyramid                        |
| CU-8     | 4 Oh   | Cube                                       |
| SAPR-8   | 5 D4d  | Square antiprism                           |
| TDD-8    | 6 D2d  | Triangular dodecahedron                    |
| JGBF-8   | 7 D2d  | Johnson gyrobifastigium J26                |
| JETBPY-8 | 8 D3h  | Johnson elongated triangular bipyramid J14 |
| JBTPR-8  | 9 C2v  | Biaugmented trigonal prism J50             |
| BTPR-8   | 10 C2v | Biaugmented trigonal prism                 |
| JSD-8    | 11 D2d | Snub diphenoid J84                         |
| TT-8     | 12 Td  | Triakis tetrahedron                        |
| ETBPY-8  | 13 D3h | Elongated trigonal bipyramid               |

| Structure [ML8 ] | OP-8   | HPY-8    | HBPY-8  | CU-8   | SAPR-8 |      |
|------------------|--------|----------|---------|--------|--------|------|
| TDD-8            | JGBF-8 | JETBPY-8 | JBTPR-8 | BTPR-8 | JSD-8  | TT-8 |
| ETBPY-8          |        |          |         |        |        |      |

ABOXIY , 32.874, 23.596, 12.324, 5.044, 2.679, 1.308,  
15.694, 27.158, 4.334, 3.739, 5.166, 5.931, 23.932

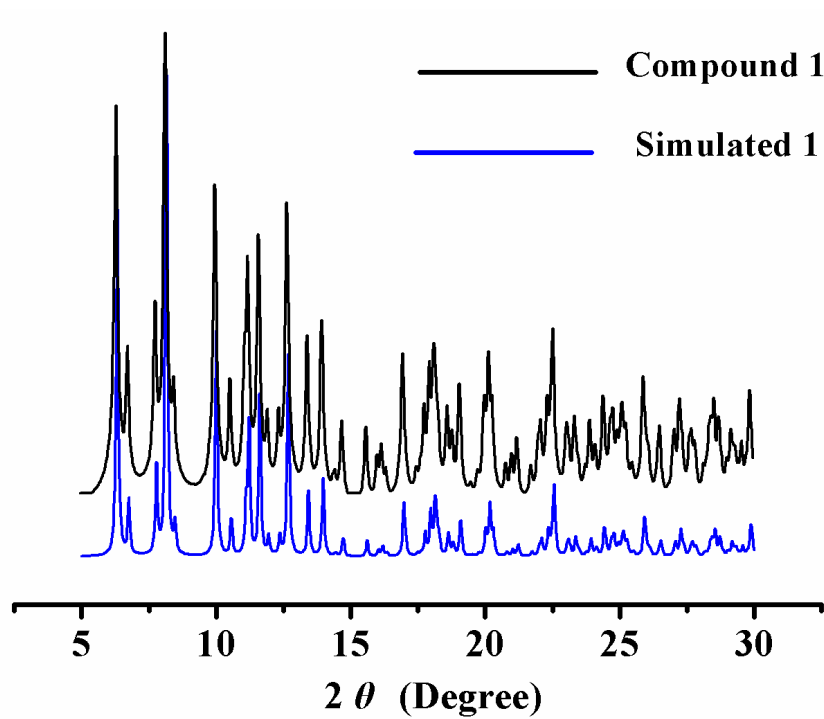

Fig. S9 XRPD curves of 1.

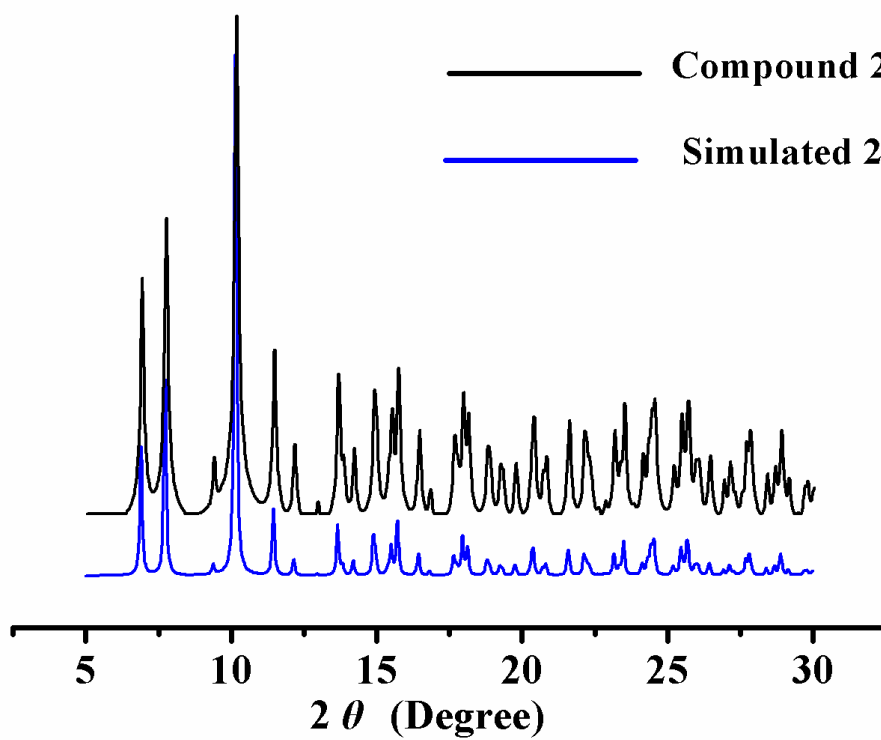

Fig. S10 XRPD curves of 2.

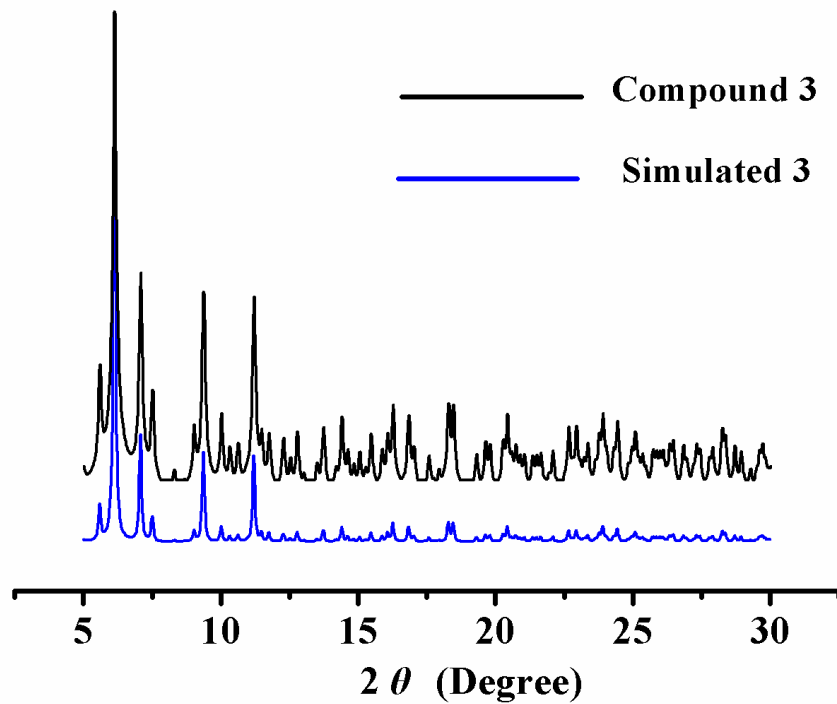

Fig. S11 XRPD curves of 3.

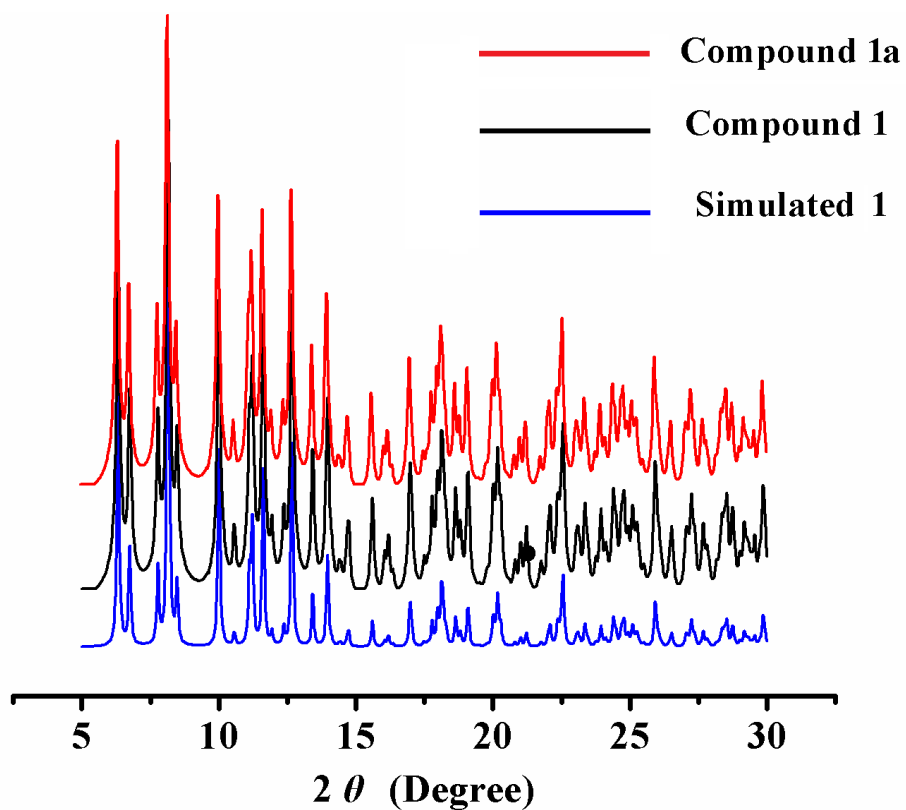

Fig. S12 XRPD curves of 1a.

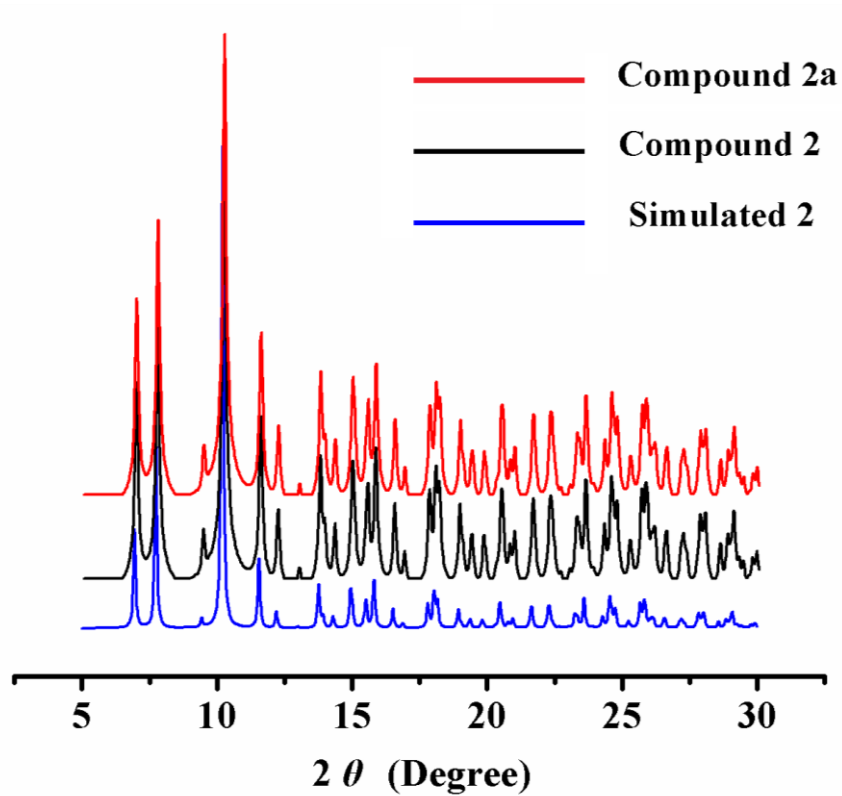

Fig. S13 XRPD curves of 2a.

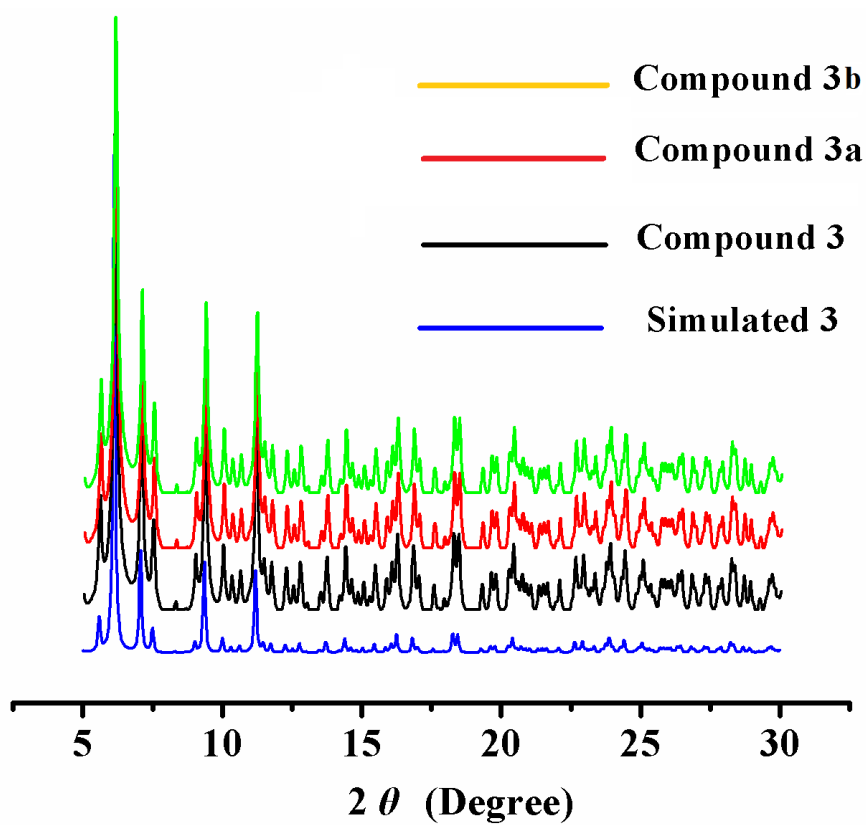

Fig. S12 XRPD curves of 3a and 3b.

### 3. Magnetic hysteresis loop for 1 at 5 K

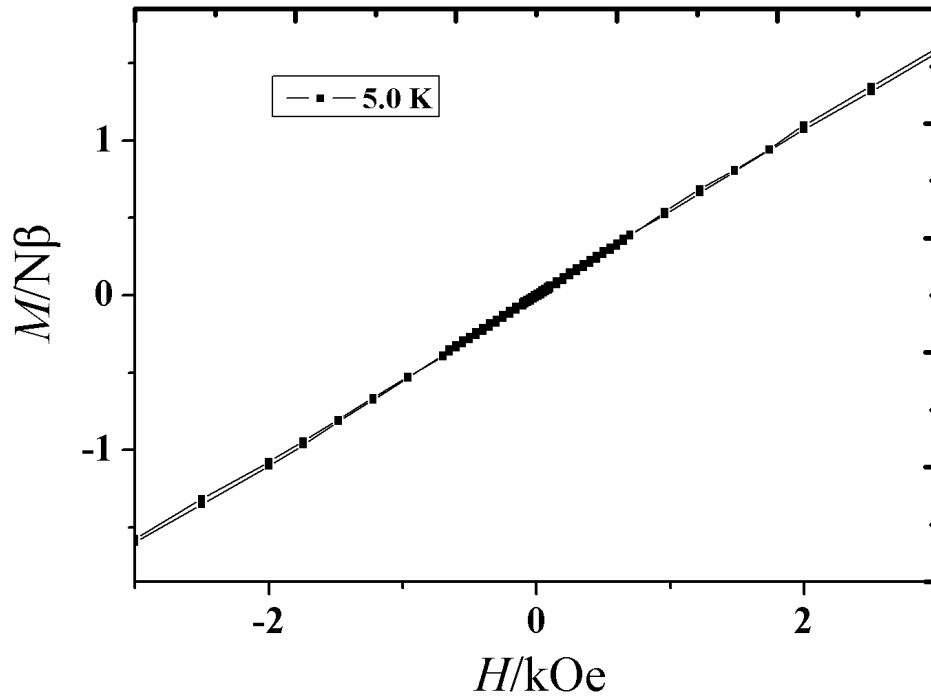

Fig. S15 Magnetic hysteresis loop for 1 at 5 K.

### 4. Relaxation fitting parameters of 1-3

The magnetic susceptibility data of 1-3 under a zero dc field were described by the modified Debye functions:

$$\chi'(\omega) = \chi_s + (\chi_T - \chi_s) \frac{1 + (\omega\tau)^{1-\alpha} \sin\left(\frac{\pi}{2}\alpha\right)}{1 + 2(\omega\tau)^{1-\alpha} \sin\left(\frac{\pi}{2}\alpha\right) + (\omega\tau)^{(2-2\alpha)}}$$

$$\chi''(\omega) = (\chi_T - \chi_s) \frac{(\omega\tau)^{1-\alpha} \cos\left(\frac{\pi}{2}\alpha\right)}{1 + 2(\omega\tau)^{1-\alpha} \sin\left(\frac{\pi}{2}\alpha\right) + (\omega\tau)^{(2-2\alpha)}}$$

$$\chi''_{\omega=\tau^{-1}} = (\chi_T - \chi_s) \frac{\cos\left(\frac{\pi}{2}\alpha\right)}{2 + 2\sin\left(\frac{\pi}{2}\alpha\right)} = \frac{1}{2}(\chi_T - \chi_s) \tan\frac{\pi}{4}(1 - \alpha)$$



**Table S4** Relaxation fitting parameters from Least-Squares Fitting of  $\chi(\omega)$  data for **1** under a zero applied dc field.

| $T$ | $\Delta\chi_1$ (cm <sup>3</sup> mol <sup>-1</sup> ) | $\Delta\chi_2$ (cm <sup>3</sup> mol <sup>-1</sup> ) | $\tau$ (s)   | $\alpha$     |
|-----|-----------------------------------------------------|-----------------------------------------------------|--------------|--------------|
| 2.0 | 0.261391E+00                                        | 0.361211E+01                                        | 0.175656E-02 | 0.140216E+00 |
| 2.2 | 0.238414E+00                                        | 0.327639E+01                                        | 0.175393E-02 | 0.140658E+00 |
| 2.4 | 0.219778E+00                                        | 0.299739E+01                                        | 0.174849E-02 | 0.140183E+00 |
| 2.6 | 0.203631E+00                                        | 0.275428E+01                                        | 0.173895E-02 | 0.139988E+00 |
| 2.8 | 0.190634E+00                                        | 0.256450E+01                                        | 0.173304E-02 | 0.139880E+00 |
| 3.0 | 0.241180E+00                                        | 0.320769E+01                                        | 0.145563E-02 | 0.134667E+00 |
| 3.2 | 0.168410E+00                                        | 0.224433E+01                                        | 0.171481E-02 | 0.139552E+00 |
| 3.6 | 0.152109E+00                                        | 0.199434E+01                                        | 0.169600E-02 | 0.138781E+00 |
| 4.0 | 0.138250E+00                                        | 0.179388E+01                                        | 0.167278E-02 | 0.138328E+00 |
| 4.4 | 0.128098E+00                                        | 0.163083E+01                                        | 0.164985E-02 | 0.136957E+00 |
| 4.8 | 0.119174E+00                                        | 0.149417E+01                                        | 0.162239E-02 | 0.135712E+00 |
| 5.2 | 0.112107E+00                                        | 0.137857E+01                                        | 0.159383E-02 | 0.133974E+00 |
| 5.6 | 0.104950E+00                                        | 0.128026E+01                                        | 0.156388E-02 | 0.133034E+00 |
| 6.0 | 0.989626E-01                                        | 0.119526E+01                                        | 0.153371E-02 | 0.132015E+00 |
| 6.5 | 0.931221E-01                                        | 0.110274E+01                                        | 0.149254E-02 | 0.129260E+00 |
| 7.0 | 0.879650E-01                                        | 0.102420E+01                                        | 0.145102E-02 | 0.126618E+00 |
| 7.5 | 0.832263E-01                                        | 0.955982E+00                                        | 0.140595E-02 | 0.123585E+00 |
| 8.0 | 0.786051E-01                                        | 0.896620E+00                                        | 0.135879E-02 | 0.122136E+00 |
| 9.0 | 0.719128E-01                                        | 0.797233E+00                                        | 0.126102E-02 | 0.115251E+00 |
| 10  | 0.662030E-01                                        | 0.718566E+00                                        | 0.115962E-02 | 0.108454E+00 |
| 11  | 0.617714E-01                                        | 0.652911E+00                                        | 0.105188E-02 | 0.100305E+00 |
| 12  | 0.576881E-01                                        | 0.599437E+00                                        | 0.943958E-03 | 0.930296E-01 |
| 14  | 0.502664E-01                                        | 0.514226E+00                                        | 0.728314E-03 | 0.778799E-01 |
| 16  | 0.439224E-01                                        | 0.452475E+00                                        | 0.538635E-03 | 0.686484E-01 |
| 18  | 0.378291E-01                                        | 0.404149E+00                                        | 0.377124E-03 | 0.676439E-01 |
| 20  | 0.333472E-01                                        | 0.365050E+00                                        | 0.245487E-03 | 0.735590E-01 |
| 25  | 0.346309E-01                                        | 0.294894E+00                                        | 0.526036E-04 | 0.106273E+00 |
| 30  | 0.149166E-06                                        | 0.248538E+00                                        | 0.702782E-05 | 0.428005E-01 |

**Table S5** Relaxation fitting parameters from Least-Squares Fitting of  $\chi(\omega)$  data for **2** under a zero applied dc field.

| $T$ | $\Delta\chi_1$ (cm <sup>3</sup> mol <sup>-1</sup> ) | $\Delta\chi_2$ (cm <sup>3</sup> mol <sup>-1</sup> ) | $\tau$ (s)   | $\alpha$     |
|-----|-----------------------------------------------------|-----------------------------------------------------|--------------|--------------|
| 2.0 | 0.465942E-01                                        | 0.289863E+01                                        | 0.197708E-01 | 0.215831E+00 |
| 2.2 | 0.425992E-01                                        | 0.263810E+01                                        | 0.198260E-01 | 0.216843E+00 |
| 2.4 | 0.394299E-01                                        | 0.242025E+01                                        | 0.198487E-01 | 0.216996E+00 |
| 2.6 | 0.366161E-01                                        | 0.223006E+01                                        | 0.198124E-01 | 0.218369E+00 |
| 2.8 | 0.340803E-01                                        | 0.207884E+01                                        | 0.198187E-01 | 0.219241E+00 |
| 3.0 | 0.348816E-01                                        | 0.209333E+01                                        | 0.196503E-01 | 0.219665E+00 |
| 3.4 | 0.286720E-01                                        | 0.171768E+01                                        | 0.195513E-01 | 0.221349E+00 |
| 3.8 | 0.261757E-01                                        | 0.154193E+01                                        | 0.193488E-01 | 0.222135E+00 |

|     |              |              |              |              |
|-----|--------------|--------------|--------------|--------------|
| 4.2 | 0.248469E-01 | 0.139581E+01 | 0.189757E-01 | 0.220758E+00 |
| 4.6 | 0.232428E-01 | 0.127673E+01 | 0.186536E-01 | 0.220674E+00 |
| 5.0 | 0.225191E-01 | 0.117522E+01 | 0.182546E-01 | 0.219616E+00 |
| 6.0 | 0.210690E-01 | 0.980746E+00 | 0.171252E-01 | 0.212692E+00 |
| 7.0 | 0.206185E-01 | 0.838673E+00 | 0.157228E-01 | 0.202344E+00 |
| 8.0 | 0.198936E-01 | 0.731708E+00 | 0.142334E-01 | 0.188511E+00 |
| 9.0 | 0.192121E-01 | 0.649344E+00 | 0.127696E-01 | 0.176043E+00 |
| 10  | 0.186252E-01 | 0.581887E+00 | 0.112805E-01 | 0.161074E+00 |
| 12  | 0.155628E-01 | 0.482084E+00 | 0.855062E-02 | 0.136948E+00 |
| 14  | 0.132252E-01 | 0.411135E+00 | 0.632224E-02 | 0.116947E+00 |
| 16  | 0.948164E-02 | 0.359856E+00 | 0.456981E-02 | 0.104106E+00 |
| 18  | 0.921472E-02 | 0.320504E+00 | 0.320975E-02 | 0.982376E-01 |
| 20  | 0.868805E-02 | 0.288662E+00 | 0.216889E-02 | 0.969097E-01 |
| 22  | 0.847249E-02 | 0.261811E+00 | 0.139808E-02 | 0.761193E-01 |
| 24  | 0.806337E-02 | 0.239134E+00 | 0.790216E-03 | 0.811517E-01 |
| 26  | 0.788403E-02 | 0.221633E+00 | 0.381680E-03 | 0.841454E-01 |
| 28  | 0.768594E-02 | 0.208025E+00 | 0.171161E-03 | 0.806470E-01 |
| 30  | 0.752449E-02 | 0.194947E+00 | 0.844968E-04 | 0.826842E-01 |
| 35  | 0.717969E-02 | 0.167564E+00 | 0.441949E-04 | 0.783574E-01 |

**Table S6** Relaxation fitting parameters from Least-Squares Fitting of  $\chi(\omega)$  data for **3** under a zero applied dc field.

| $T$ | $\Delta\chi_1$ (cm <sup>3</sup> mol <sup>-1</sup> ) | $\Delta\chi_2$ (cm <sup>3</sup> mol <sup>-1</sup> ) | $\tau$ (s)   | $\alpha$     |
|-----|-----------------------------------------------------|-----------------------------------------------------|--------------|--------------|
| 2.0 | 0.121077E+01                                        | 0.673671E+01                                        | 0.796071E-03 | 0.397530E+00 |
| 2.2 | 0.109801E+01                                        | 0.607124E+01                                        | 0.756133E-03 | 0.399594E+00 |
| 2.4 | 0.996063E+00                                        | 0.552736E+01                                        | 0.718862E-03 | 0.401859E+00 |
| 2.6 | 0.914338E+00                                        | 0.505993E+01                                        | 0.688912E-03 | 0.403261E+00 |
| 2.8 | 0.855042E+00                                        | 0.468149E+01                                        | 0.668629E-03 | 0.404206E+00 |
| 3.0 | 0.860441E+00                                        | 0.439862E+01                                        | 0.821137E-03 | 0.413667E+00 |
| 3.2 | 0.745063E+00                                        | 0.407136E+01                                        | 0.626539E-03 | 0.407282E+00 |
| 3.4 | 0.700888E+00                                        | 0.382056E+01                                        | 0.609033E-03 | 0.408323E+00 |
| 3.6 | 0.662317E+00                                        | 0.359830E+01                                        | 0.591768E-03 | 0.409957E+00 |
| 3.8 | 0.648599E+00                                        | 0.339939E+01                                        | 0.587118E-03 | 0.409511E+00 |
| 4.0 | 0.623371E+00                                        | 0.322213E+01                                        | 0.574380E-03 | 0.411000E+00 |
| 4.2 | 0.600968E+00                                        | 0.306109E+01                                        | 0.559941E-03 | 0.411077E+00 |
| 4.4 | 0.568168E+00                                        | 0.292034E+01                                        | 0.542438E-03 | 0.414651E+00 |
| 4.6 | 0.554784E+00                                        | 0.278905E+01                                        | 0.533813E-03 | 0.415430E+00 |
| 4.8 | 0.545100E+00                                        | 0.266777E+01                                        | 0.525098E-03 | 0.415851E+00 |
| 5.0 | 0.540499E+00                                        | 0.255663E+01                                        | 0.520293E-03 | 0.415488E+00 |
| 5.5 | 0.531911E+00                                        | 0.231441E+01                                        | 0.507471E-03 | 0.413589E+00 |
| 6.0 | 0.536898E+00                                        | 0.211610E+01                                        | 0.505842E-03 | 0.409592E+00 |
| 6.5 | 0.554169E+00                                        | 0.194685E+01                                        | 0.513723E-03 | 0.400435E+00 |
| 7.0 | 0.571697E+00                                        | 0.180202E+01                                        | 0.523581E-03 | 0.387980E+00 |

|     |              |              |              |              |
|-----|--------------|--------------|--------------|--------------|
| 8.0 | 0.594646E+00 | 0.156763E+01 | 0.521257E-03 | 0.352869E+00 |
| 10  | 0.578048E+00 | 0.124204E+01 | 0.341513E-03 | 0.274351E+00 |

## 5. Computational details

For compounds **1** and **2**, there is only one magnetic center Dy<sup>III</sup> ion. For binuclear compound **3**, it has two types of Dy<sup>III</sup> fragments, and thus two Dy<sup>III</sup> fragments were calculated. Complete-active-space self-consistent field (CASSCF) calculations on compounds **1-3** (seen Fig. S8 for the calculated complete structures of compounds **1** and **2**, and the model structure of compound **3**) extracted from the compounds on the basis of single-crystal X-ray determined geometry have been carried out with MOLCAS 8.2<sup>S1</sup> program package. For compound **3**, each Dy<sup>III</sup> fragment was calculated keeping the experimentally determined structure of the corresponding compound while replacing the neighbouring Dy<sup>III</sup> ion by diamagnetic Lu<sup>III</sup>.

The basis sets for all atoms are atomic natural orbitals from the MOLCAS ANO-RCC library: ANO-RCC-VTZP for Dy<sup>III</sup> ion; VTZ for close N and O; VDZ for distant atoms. The calculations employed the second order Douglas-Kroll-Hess Hamiltonian, where scalar relativistic contractions were taken into account in the basis set and the spin-orbit couplings were handled separately in the restricted active space state interaction (RASSI-SO) procedure. For individual Dy<sup>III</sup> fragment, active electrons in 7 active spaces include all *f* electrons (CAS(9 in 7)) in the CASSCF calculation. To exclude all the doubts, we calculated all the roots in the active space. We have mixed the maximum number of spin-free state which was possible with our hardware (all from 21 sextets, 128 from 224 quadruplets, 130 from 490 doublets). SINGLE-ANISO<sup>S2</sup> program was used to obtain the energy levels, *g* tensors, *m<sub>J</sub>* values, magnetic axes, *et al.*, based on the above CASSCF/RASSI-SO calculations.

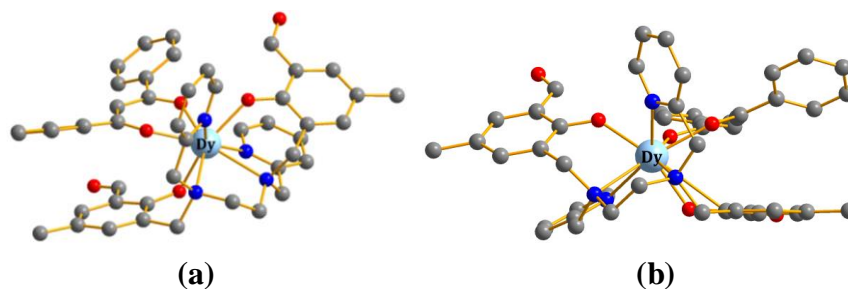

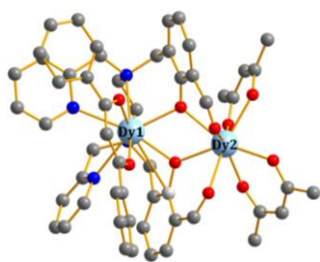

(c)

Fig. S16 Calculated structures of compounds **1-3** (a-c); H atoms are omitted.

To fit the exchange interaction in compound **3**, we took two steps to obtain them. Firstly, we calculated individual Dy<sup>III</sup> fragments using CASSCF to obtain the corresponding magnetic properties. Then, the exchange interaction between the magnetic centers is considered within the Lines model,<sup>S3</sup> while the account of the dipole-dipole magnetic coupling is treated exactly. The Lines model is effective and has been successfully used widely in the research field of *f*-element single-molecule magnets.<sup>S4</sup>

For compound **3**, there is only one type of *J*.

The exchange Ising Hamiltonian is:

$$\hat{H}_{exch} = -J_1 \hat{S}_{Dy1} \hat{S}_{Dy2} \quad (S1)$$

The  $J_{total}$  is the parameter of the total magnetic interaction ( $J_{total} = J_{dipolar} + J_{exchange}$ ) between magnetic center ions. The  $\hat{S}_{Dy} = \pm 1/2$  are the ground pseudospin on the Dy<sup>III</sup> sites. The dipolar magnetic coupling can be calculated exactly, while the exchange coupling constants were fitted through comparison of the computed and measured magnetic susceptibility using the Poly\_Aniso program.<sup>S2</sup>

Table S7 Exchange energies (cm<sup>-1</sup>) and main values of the  $g_z$  for the lowest two exchange doublets of compound **3**.

|     | <b>3</b>           |        |
|-----|--------------------|--------|
|     | $E/\text{cm}^{-1}$ | $g_z$  |
| Dy1 | 0.0                | 33.718 |
| Dy2 | 0.5                | 17.959 |

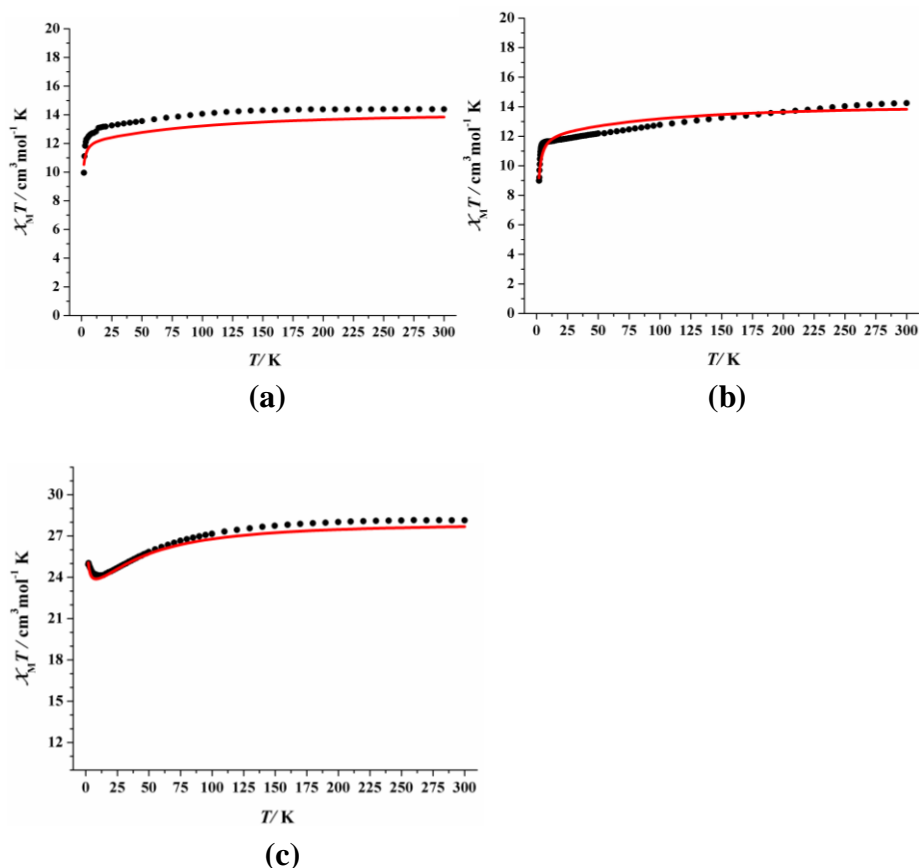

Fig. S17 Calculated (red solid line) and experimental (black circle dot) data of magnetic susceptibilities of compounds **1-3** (a-c). The intermolecular interactions  $zJ'$  of **1-3** were fitted to  $-0.10$ ,  $-0.08$  and  $-0.00 \text{ cm}^{-1}$ , respectively.

### References:

- S1 F. Aquilante, J. Autschbach, R. K. Carlson, L. F. Chibotaru, M. G. Delcey, L. De Vico, I. Fdez. Galván, N. Ferré, L. M. Frutos, L. Gagliardi, M. Garavelli, A. Giussani, C. E. Hoyer, G. Li Manni, H. Lischka, D. Ma, P. Å. Malmqvist, T. Müller, A. Nenov, M. Olivucci, T. B. Pedersen, D. Peng, F. Plasser, B. Pritchard, M. Reiher, I. Rivalta, I. Schapiro, J. Segarra-Martí, M. Stenrup, D. G. Truhlar, L. Ungur, A. Valentini, S. Vancoillie, V. Veryazov, V. P. Vysotskiy, O. Weingart, F. Zapata, R. Lindh, MOLCAS 8: New Capabilities for Multiconfigurational Quantum Chemical Calculations across the Periodic Table, *J. Comput. Chem.*, **2016**, *37*, 506.
- S2 (a) Chibotaru, L. F.; Ungur, L.; Soncini, A. *Angew. Chem. Int. Ed.*, **2008**, *47*, 4126. (b) Ungur, L.; Van den Heuvel, W.; Chibotaru, L. F. *New J. Chem.*, **2009**, *33*, 1224. (c) Chibotaru, L. F.; Ungur, L.; Aronica, C.; Elmoll, H.; Pilet, G.; Luneau, D. *J. Am. Chem. Soc.*, **2008**, *130*, 12445.
- S3 Lines, M. E. *J. Chem. Phys.* **1971**, *55*, 2977.
- S4 (a) Mondal, K. C.; Sundt, A.; Lan, Y. H.; Kostakis, G. E.; Waldmann, O.; Ungur, L.; Chibotaru, L. F.; Anson, C. E.; Powell, A. K. *Angew. Chem. Int. Ed.* **2012**, *51*, 7550. (b) Langley, S. K.; Wielechowski, D. P.; Vieru, V.; Chilton, N. F.; Moubaraki, B.; Abrahams, B. F.; Chibotaru, L. F.; Murray, K. S. *Angew. Chem. Int.*

*Ed.* **2013**, 52, 12014.
